# Supplementary material for: Economic Consequences of Cooling Water Insufficiency in the Thermal Power Sector under Climate Change Scenarios
Source: Preprints.org preprint supplement (doi:10.20944/preprints201809.0353.v1), 2018-09-18
Supplement: Supplementary file 1 [file supplementary]

**Supplementary Material**

**Economic Consequences of Cooling Water Insufficiency in the Thermal Power Sector under Climatic Change Scenarios**

Qian Zhou12, Naota Hanasaki*1, Shinichiro Fujimori3 4

1 Center for Global Environmental Research, National Institute for Environmental Studies, 16-2 Onogawa, Tsukuba, Ibaraki 305-8506, Japan

2 School of Economics and Management, North China Electric Power University, Changping, Beijing 102206, China;

3 Department of Environmental Engineering, Kyoto University, 615-8540 Kyoto, Japan

4 Center for Social and Environmental Systems Research, National Institute for Environmental Studies, 16-2 Onogawa, Tsukuba, Ibaraki 305-8506, Japan

*Correspondence: hanasaki@nies.go.jp

Tel:　+81-29-850-2929; Fax: +81-29-850-2960

**Supplemental Tables**

**Table S1.** Regional classifications.

| Code | Regions | 5 aggregated regions |
| --- | --- | --- |
| JPN | Japan | OECD90 |
| CHN | China | Asia |
| IND | India | Asia |
| XSE | Southeast Asia | Asia |
| XSA | Rest of Asia | Asia |
| XOC | Oceania | OECD90 |
| XE25 | EU25 | OECD90 |
| XER | Rest of Europe | REF |
| CIS | Former Soviet Union | REF |
| TUR | Turkey | OECD90 |
| CAN | Canada | OECD90 |
| USA | United States | OECD90 |
| BRA | Brazil | Latin America |
| XLM | Rest of Latin America | Latin America |
| XME | Middle East | Middle East and Africa |
| XNF | North Africa | Middle East and Africa |
| XAF | Sub-Saharan Africa | Middle East and Africa |

**Table S2.** Industrial classification.

| 6 aggregated sectors |  | | | | |
| --- | --- | --- | --- | --- | --- |
| Agriculture | Rice | Wheat | Other grains | Oil seed crops | Other crops |
| Ruminant livestock | Non-ruminant livestock | Other livestock and fisheries | Forestry |  |
| Energy extraction | Coal mining | Oil mining | Gas mining | Petroleum refinery | Coal transformation |
| Biomass transformation (1st generation) | Biomass transformation (2nd generation with energy crops) | Biomass transformation (2nd generation with residues) | Gas distribution |  |
| Power | Coal-fired power | Oil-fired power | Gas-fired power | Nuclear power | Geothermal power |
| Advanced biomass-power generation | Waste biomass power | Other renewable energy power generation |  |  |
| Hydroelectric power | Photovoltaic power | Wind power |  |  |
| Manufacturing and construction | Mineral mining and other quarrying | Food products | Textiles, apparel, and leather | Wood products | Paper, paper products, and pulp |
| Chemical, plastic, and rubber products | Iron and steel | Nonferrous products | Other manufacturing | Construction |
| Transport and communications | Transport and communications |  |  |  |  |
| Service | Other service sectors | CCS service |  |  |  |
